# Supplementary material for: Transcriptomic profiling of gene expression and RNA processing during Leishmania major differentiation
Source: PubMed Central journal article supplement (PMC4538839; doi:10.1093/nar/gkv656), 2015-07-06
Supplement: supp_gkv656_nar-01429-a-2015-File009.pdf [file supp_gkv656_nar-01429-a-2015-File009.pdf]

## Supplementary Data

Transcriptomic profiling of gene expression and RNA processing  
during *Leishmania major* differentiation

Laura A. L. Dillon, Kwame Okrah, V. Keith Hughitt, Rahul Suresh, Yuan Li, Maria Cecilia  
Fernandes, A. Trey Belew, Hector Corrada Bravo, David M. Mosser, Najib M. El-Sayed

This supplement contains:

Figures S1 to S7

Tables S1 and S2

Datasets S1 to S5

Supplementary Figure Legends

Supplementary References

## TABLE OF CONTENTS

|                   |                                                                                                                                                                              |
|-------------------|------------------------------------------------------------------------------------------------------------------------------------------------------------------------------|
| <b>Figure S1</b>  | Sample diagnostics to globally assess data similarities and identify outliers.                                                                                               |
| <b>Figure S2</b>  | Mean-variance curve modeling and fitting of a local regression trend line by <code>voom</code> .                                                                             |
| <b>Figure S3</b>  | Sample characterization.                                                                                                                                                     |
| <b>Figure S4</b>  | Principal Components Analysis (PCA) and hierarchical clustering analysis before accounting for batch effects.                                                                |
| <b>Figure S5</b>  | Gene ontology trees.                                                                                                                                                         |
| <b>Figure S6</b>  | UTR length distribution by developmental stage.                                                                                                                              |
| <b>Figure S7</b>  | Visualization of changes in primary <i>trans</i> -splicing sites across developmental stages.                                                                                |
| <b>Table S1</b>   | Experimental design.                                                                                                                                                         |
| <b>Table S2</b>   | Dinucleotide acceptor site usage frequency.                                                                                                                                  |
| <b>Dataset S1</b> | Coordinates of novel ORFs.                                                                                                                                                   |
| <b>Dataset S2</b> | Results from differential expression analysis of <i>L. major</i> metacyclogenesis using <code>limma</code> (protein-coding genes from TriTrypDB v 6.0).                      |
| <b>Dataset S3</b> | Results from differential expression analysis of <i>L. major</i> metacyclogenesis using <code>limma</code> (protein-coding genes from TriTrypDB v 6.0 and 1,044 novel ORFs). |
| <b>Dataset S4</b> | Enriched GO categories and corresponding differentially expressed genes.                                                                                                     |
| <b>Dataset S5</b> | UTR coordinates.                                                                                                                                                             |

Figure S1

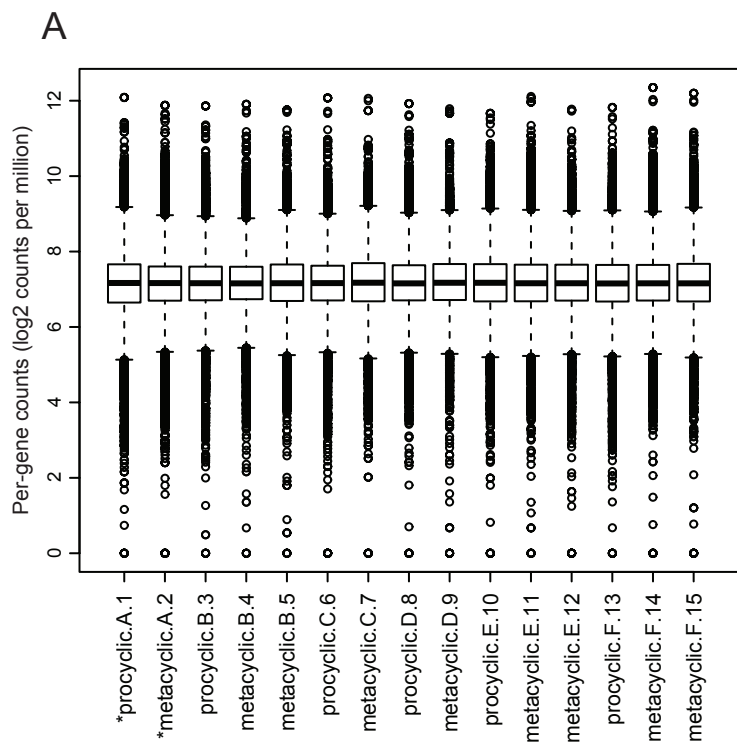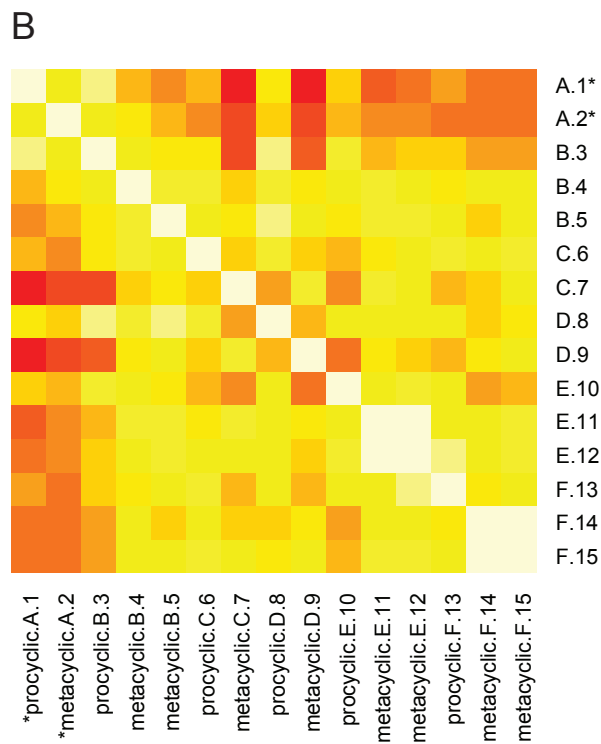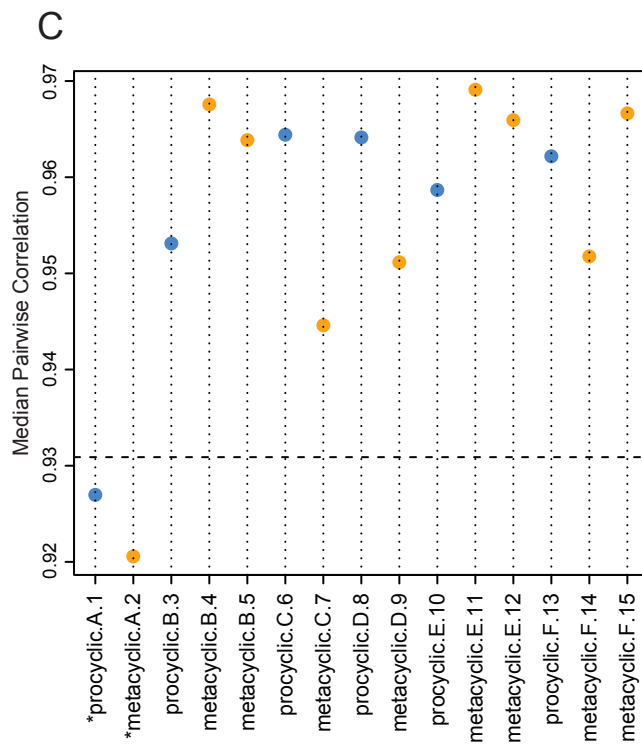

Figure S2

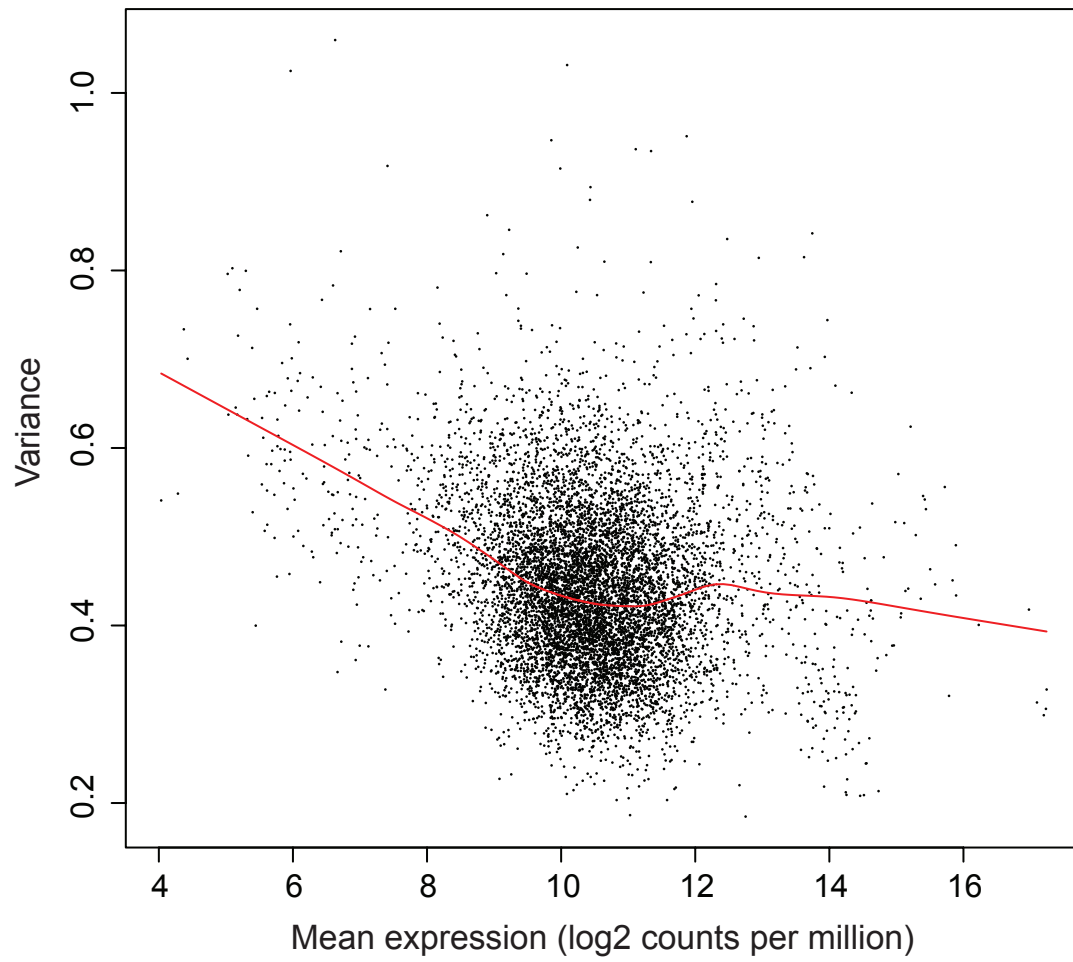

Figure S3

A

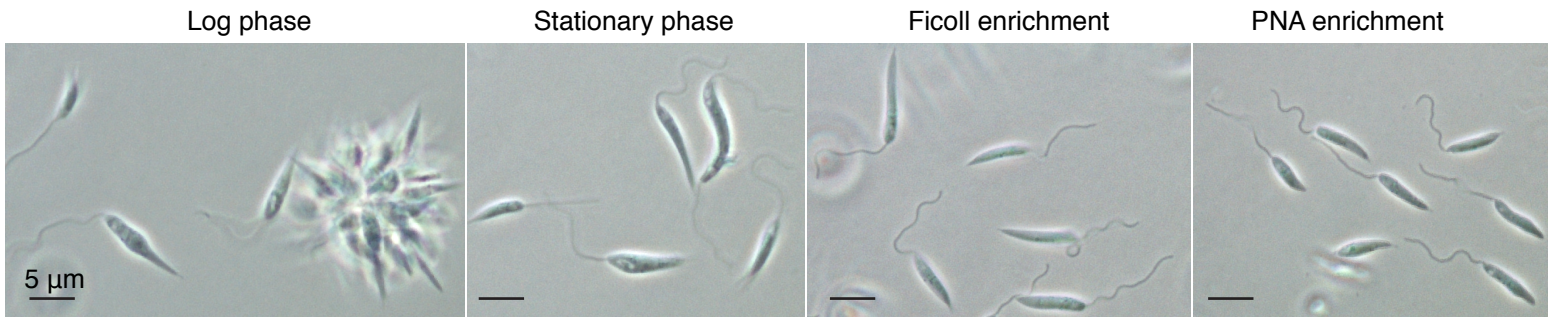

B

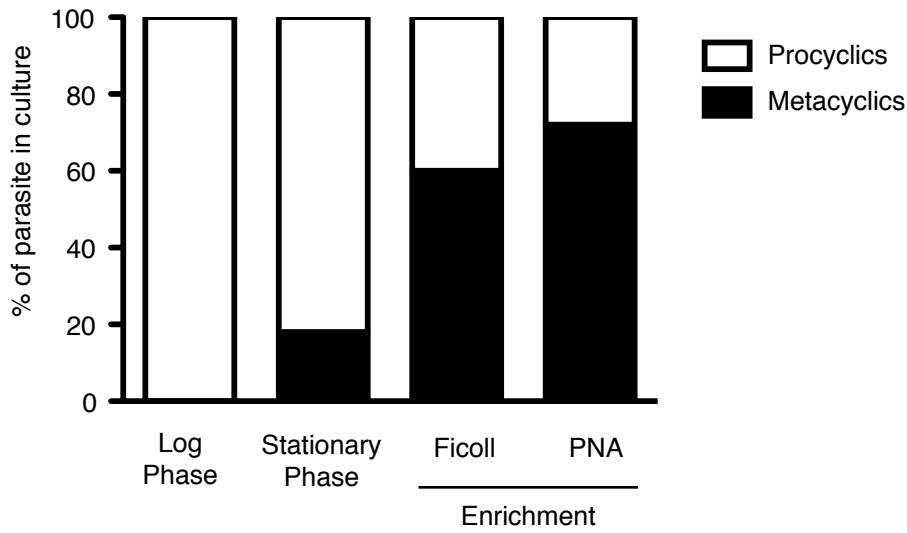

C

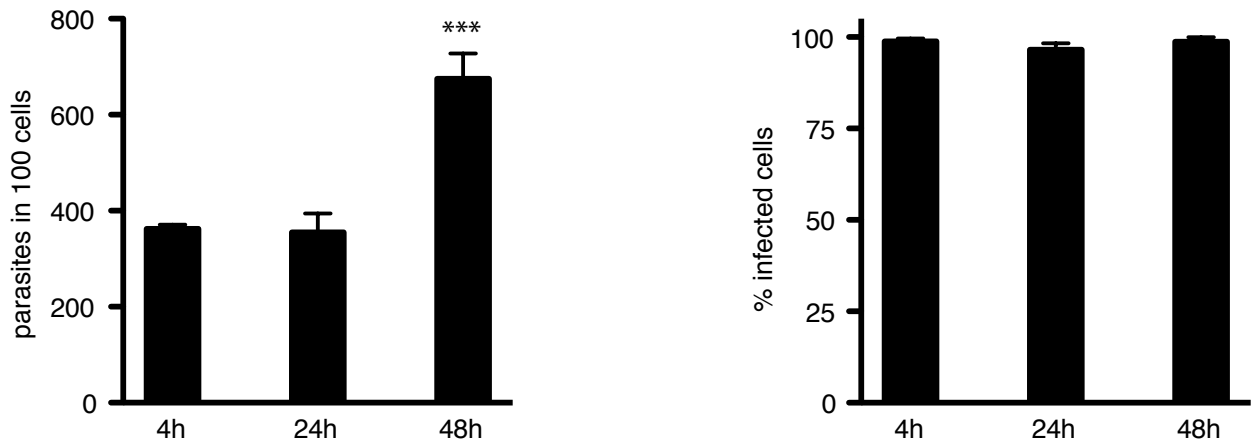

Figure S4

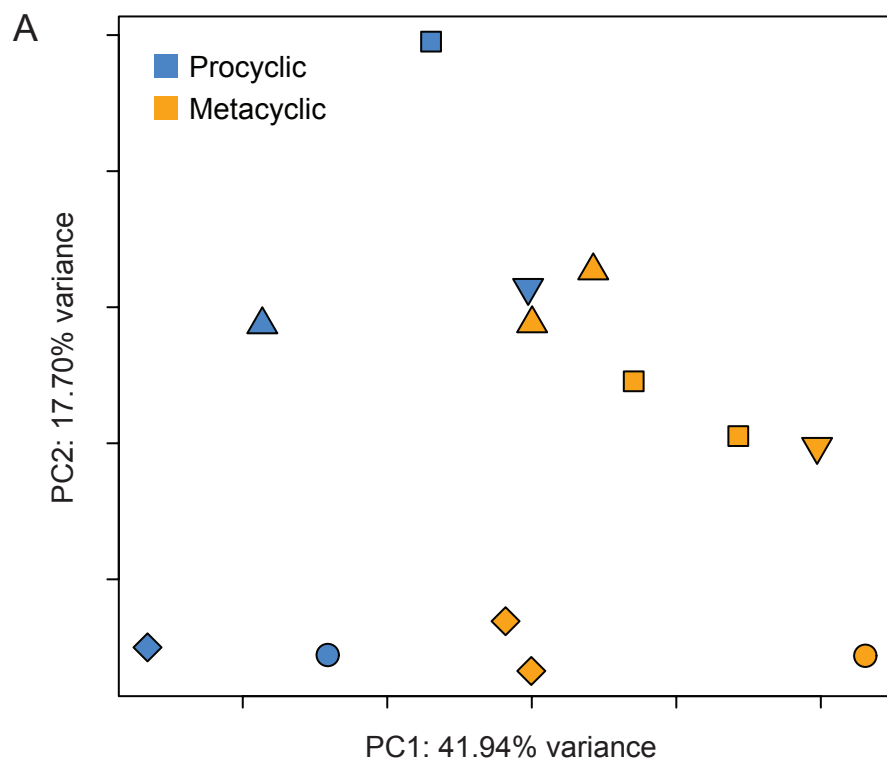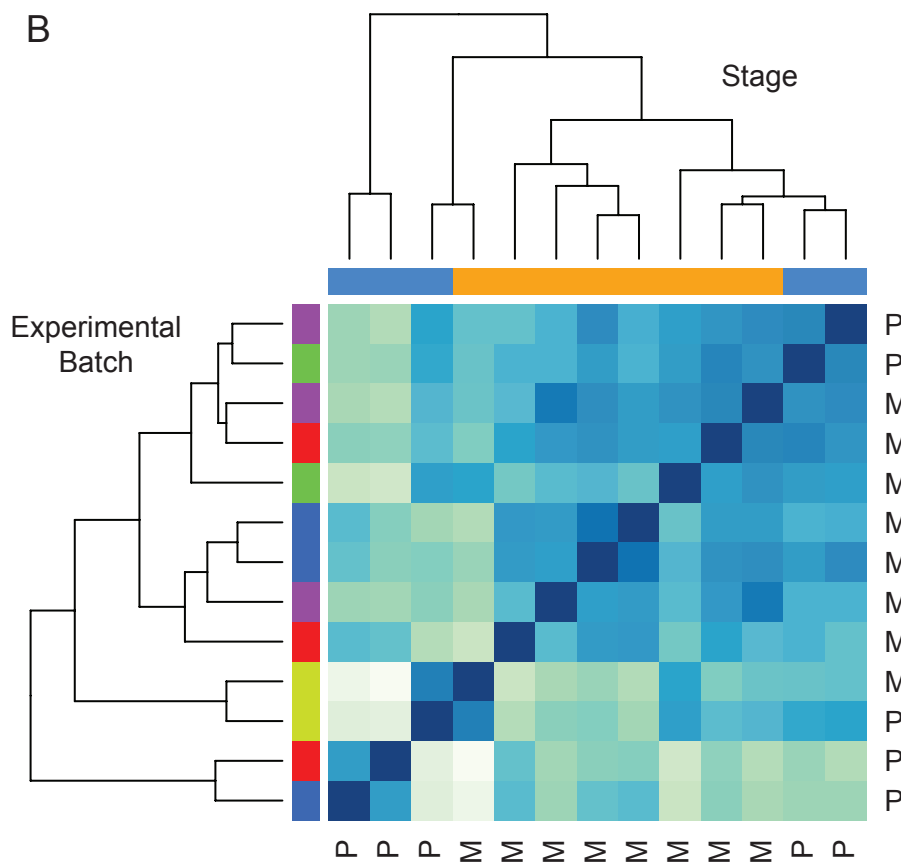

Figure S5A

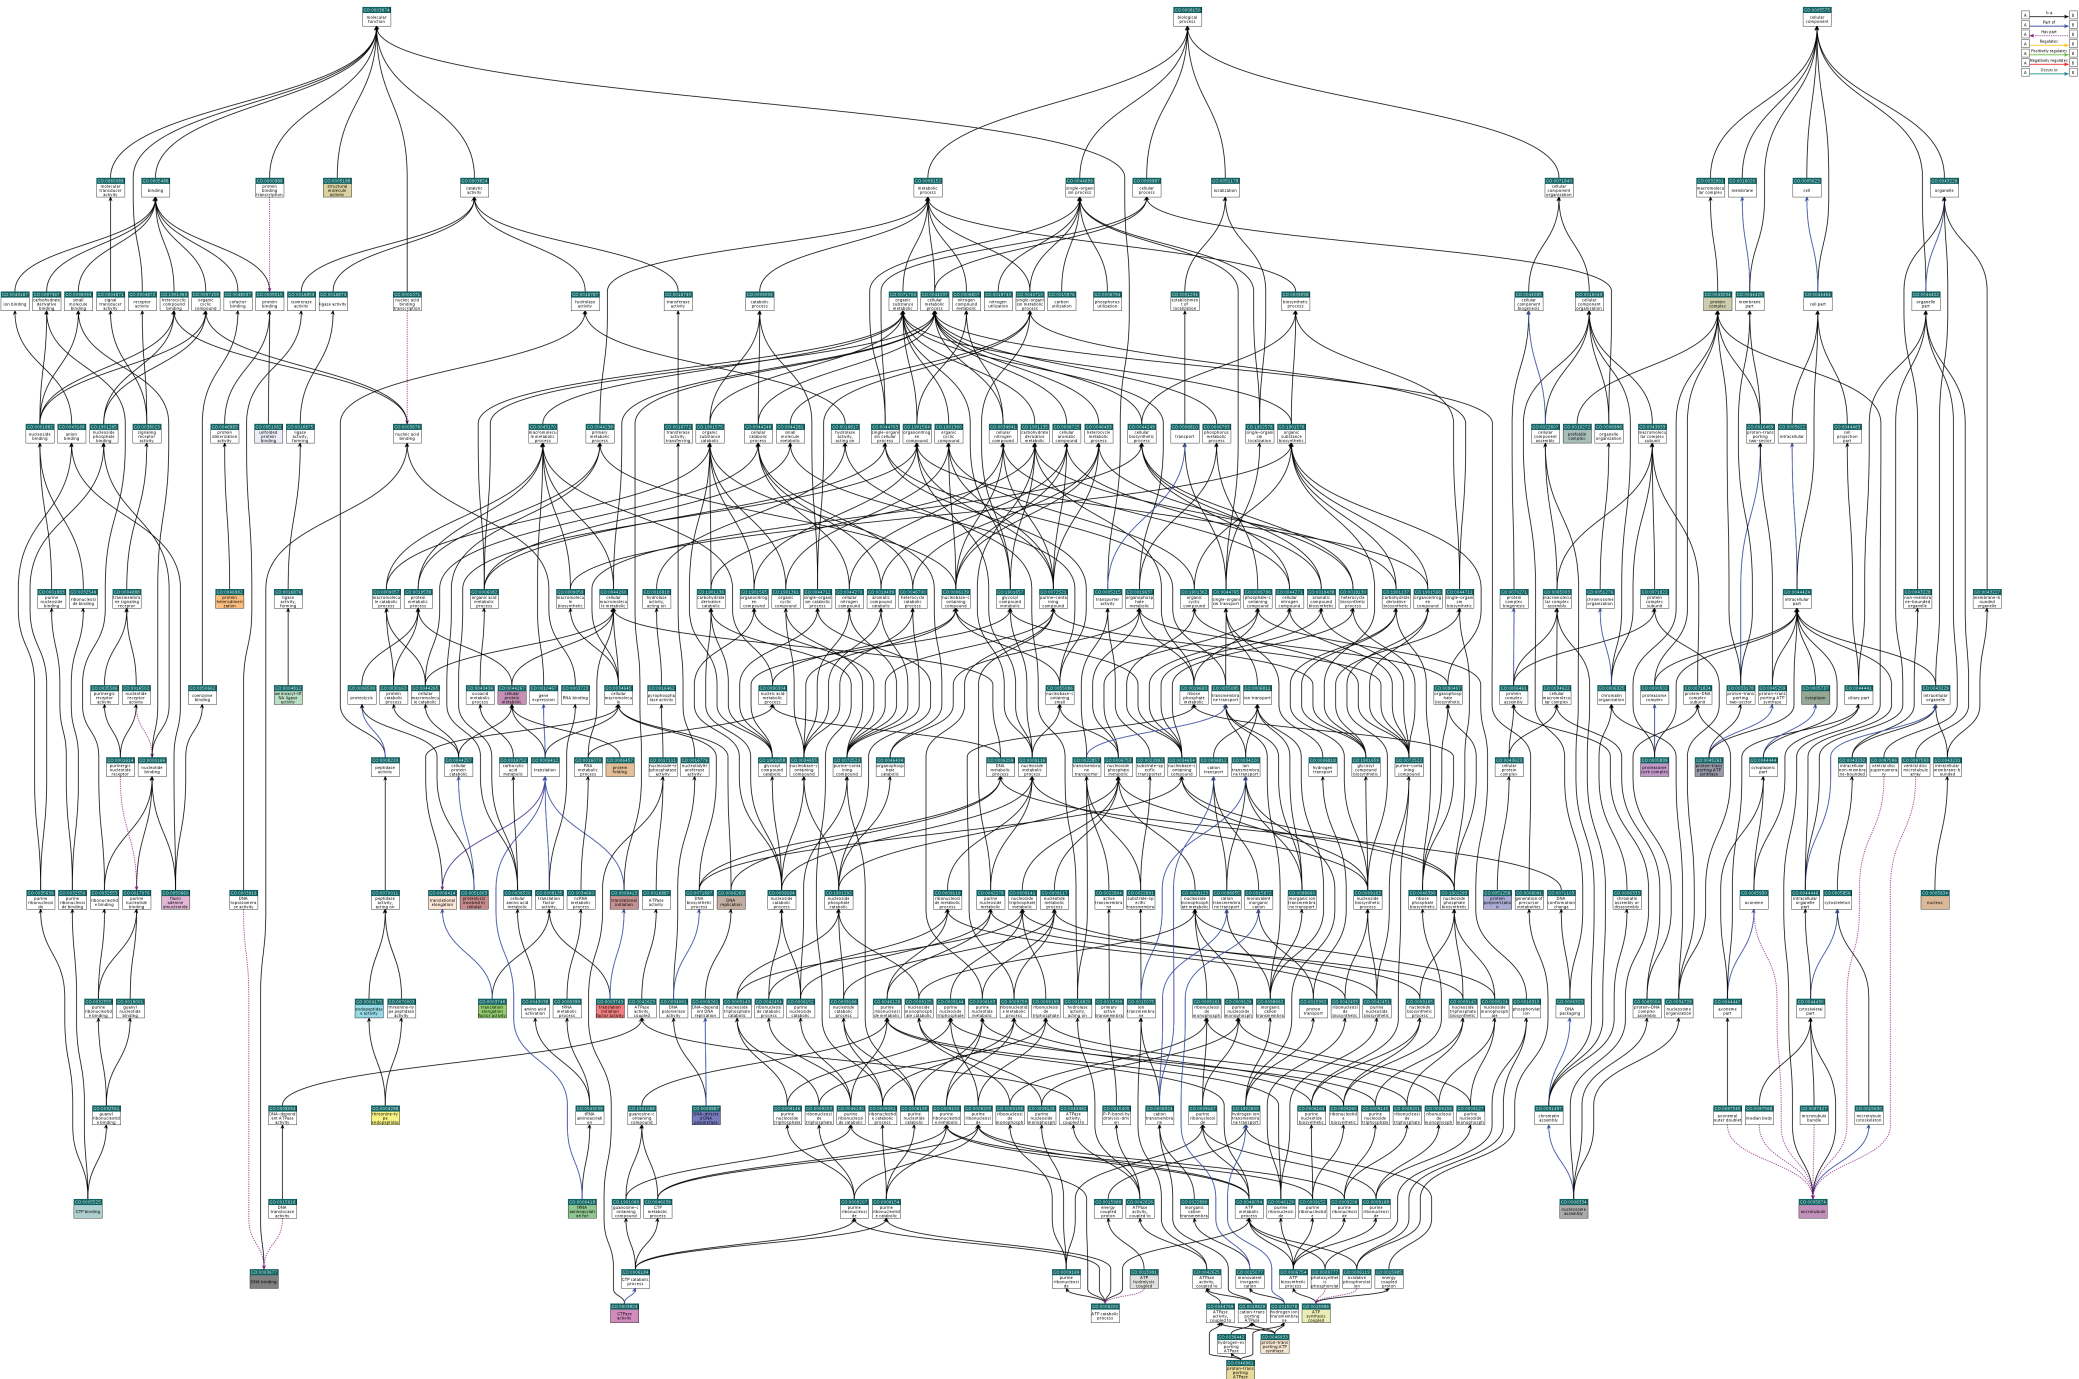





Figure S6

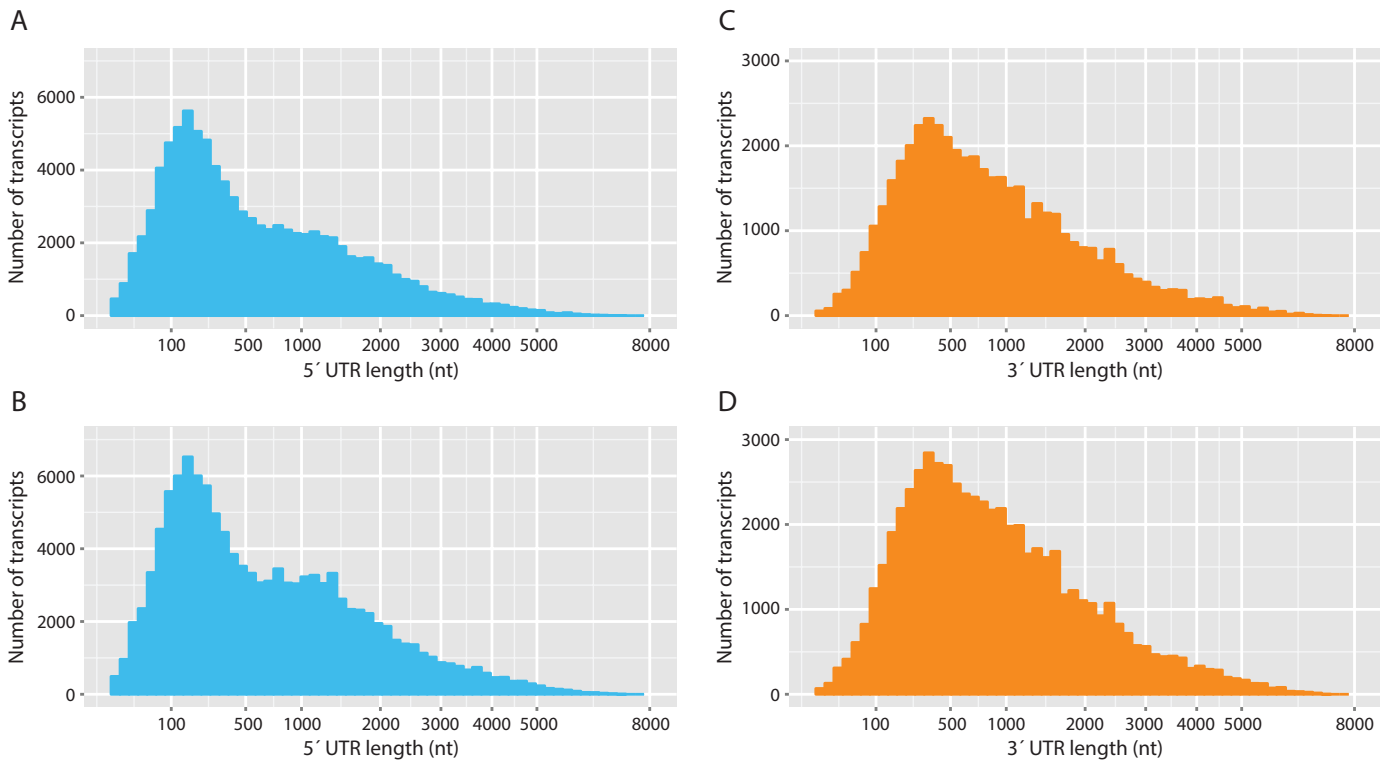

Figure S7

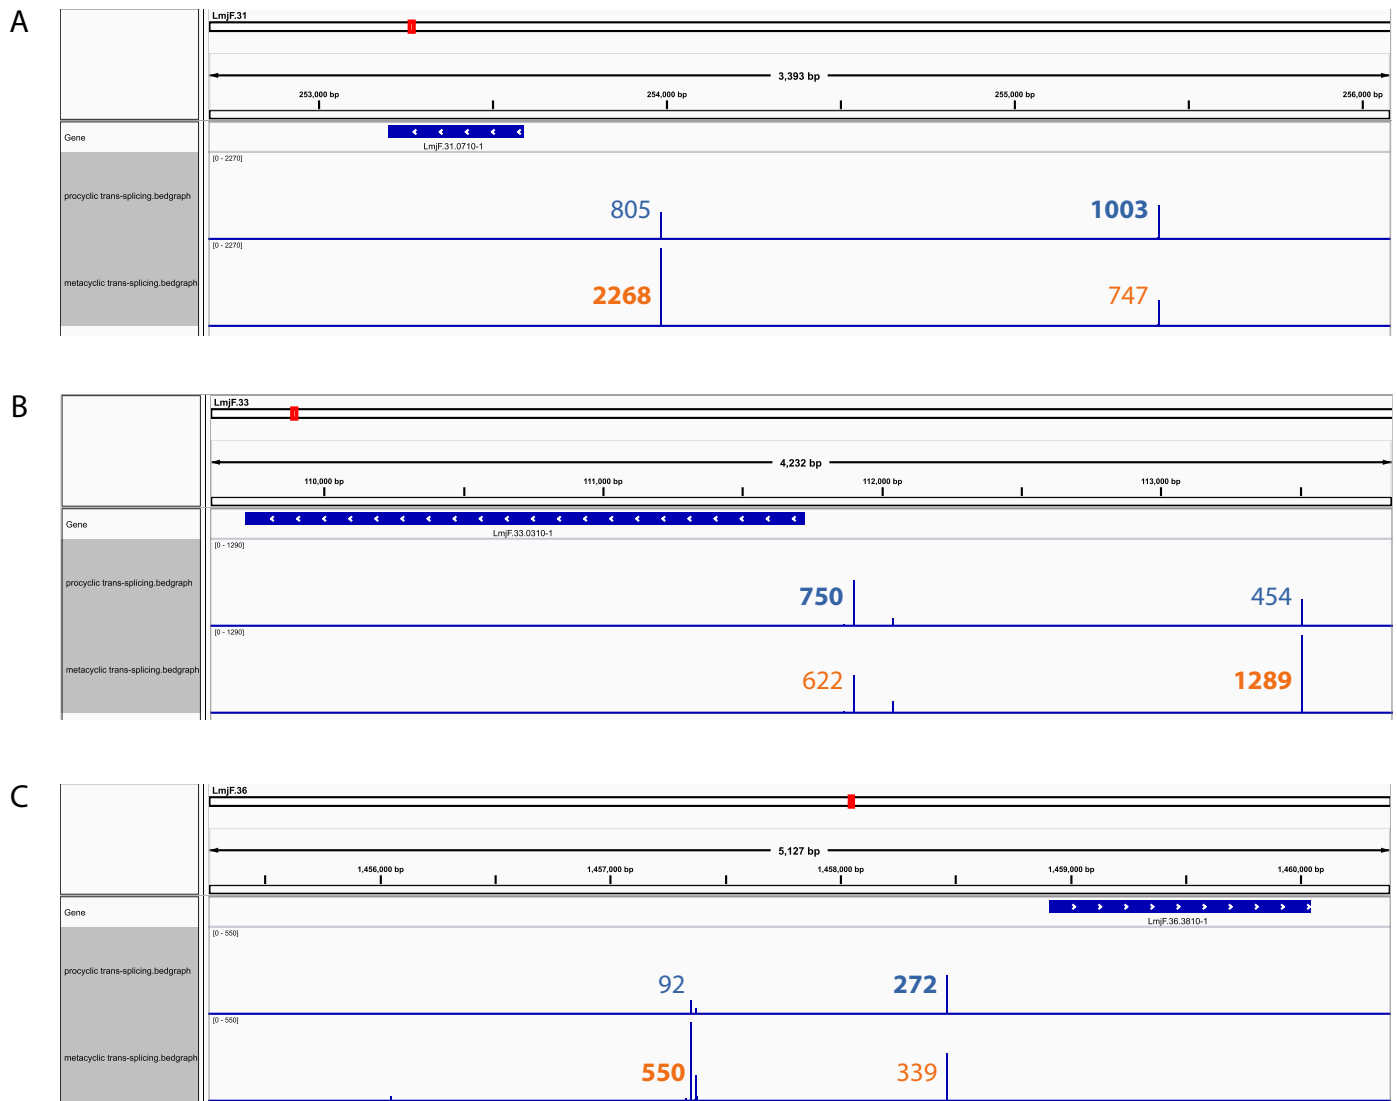

Table S1. Experimental Design

| ID for this Manuscript | Sample ID | SRA Accession Number | Promastigote Stage (Enrichment Method) | Batch | Number of reads passing Illumina filter | Number of reads mapped | Percentage of reads mapped |
|------------------------|-----------|----------------------|----------------------------------------|-------|-----------------------------------------|------------------------|----------------------------|
| 1                      | HPGL0075  | n/a                  | procyclic                              | A     | 62,051,890                              | 55,352,314             | 89.20                      |
| 2                      | HPGL0076  | n/a                  | metacyclic (Ficoll)                    | A     | 52,660,754                              | 47,712,265             | 90.60                      |
| 3                      | HPGL0096  | SRR1460763           | procyclic                              | B     | 103,466,044                             | 92,748,560             | 89.64                      |
| 4                      | HPGL0097  | SRR1460764           | metacyclic (PNA)                       | B     | 76,253,690                              | 69,557,423             | 91.22                      |
| 5                      | HPGL0098  | SRR1460765           | metacyclic (Ficoll)                    | B     | 93,319,752                              | 84,580,995             | 90.64                      |
| 6                      | HPGL0164  | SRR1460766           | procyclic                              | C     | 46,155,070                              | 42,801,506             | 92.73                      |
| 7                      | HPGL0165  | SRR1460767           | metacyclic (Ficoll)                    | C     | 45,492,872                              | 41,811,082             | 91.91                      |
| 8                      | HPGL0192  | SRR1460768           | procyclic                              | D     | 64,505,484                              | 58,857,640             | 91.24                      |
| 9                      | HPGL0193  | SRR1460769           | metacyclic (Ficoll)                    | D     | 70,178,176                              | 63,898,517             | 91.05                      |
| 10                     | HPGL0228  | SRR1460770           | procyclic                              | E     | 105,948,882                             | 98,120,201             | 92.61                      |
| 11                     | HPGL0229  | SRR1460771           | metacyclic (PNA)                       | E     | 77,161,294                              | 71,310,256             | 92.42                      |
| 12                     | HPGL0230  | SRR1460772           | metacyclic (Ficoll)                    | E     | 84,056,646                              | 77,364,378             | 92.04                      |
| 13                     | HPGL0324  | SRR1460773           | procyclic                              | F     | 69,215,652                              | 63,766,203             | 92.13                      |
| 14                     | HPGL0325  | SRR1460774           | metacyclic (PNA)                       | F     | 64,195,828                              | 59,048,832             | 91.98                      |
| 15                     | HPGL0326  | SRR1460775           | metacyclic (Ficoll)                    | F     | 60,167,474                              | 55,318,601             | 91.94                      |
| Total                  |           |                      |                                        |       | 1,074,829,508                           | 982,248,773            | 91.39                      |

| ID for this Manuscript | Number of SL-containing reads | Percentage of reads containing SL sequence | Number of polyA-containing reads | Percentage of reads containing polyA sequence |
|------------------------|-------------------------------|--------------------------------------------|----------------------------------|-----------------------------------------------|
| 1                      | n/a                           | n/a                                        | n/a                              | n/a                                           |
| 2                      | n/a                           | n/a                                        | n/a                              | n/a                                           |
| 3                      | 4,095,395                     | 3.96                                       | 58,064                           | 0.06                                          |
| 4                      | 2,658,344                     | 3.49                                       | 56,582                           | 0.07                                          |
| 5                      | 3,634,321                     | 3.89                                       | 47,581                           | 0.05                                          |
| 6                      | 1,772,321                     | 3.84                                       | 39,718                           | 0.09                                          |
| 7                      | 1,360,561                     | 2.99                                       | 44,785                           | 0.10                                          |
| 8                      | 2,359,763                     | 3.66                                       | 43,034                           | 0.07                                          |
| 9                      | 2,439,369                     | 3.48                                       | 48,044                           | 0.07                                          |
| 10                     | 3,252,367                     | 3.07                                       | 49,416                           | 0.05                                          |
| 11                     | 2,645,944                     | 3.43                                       | 41,414                           | 0.05                                          |
| 12                     | 3,034,977                     | 3.61                                       | 41,102                           | 0.05                                          |
| 13                     | 3,752,380                     | 5.42                                       | 13,684                           | 0.02                                          |
| 14                     | 3,355,270                     | 5.23                                       | 13,606                           | 0.02                                          |
| 15                     | 3,064,443                     | 5.09                                       | 12,270                           | 0.02                                          |
| Total                  | 37,425,455                    | 3.90                                       | 509,300                          | 0.05                                          |

Table S2. Dinucleotide acceptor site usage frequency

| Acceptor Sequence | Primary | Minor  |
|-------------------|---------|--------|
| AG                | 96.80%  | 42.81% |
| TG                | 0.68%   | 11.27% |
| GG                | 0.56%   | 9.35%  |
| CG                | 0.47%   | 7.79%  |
| TT                | 0.37%   | 3.35%  |
| GC                | 0.21%   | 3.41%  |
| GT                | 0.14%   | 3.31%  |
| TC                | 0.14%   | 2.16%  |
| CA                | 0.11%   | 3.07%  |
| AC                | 0.11%   | 2.35%  |
| AT                | 0.11%   | 2.32%  |
| GA                | 0.08%   | 2.11%  |
| CT                | 0.07%   | 2.07%  |
| CC                | 0.06%   | 1.89%  |
| AA                | 0.04%   | 1.56%  |
| TA                | 0.04%   | 1.19%  |

## SUPPLEMENTARY FIGURE LEGENDS

**Figure S1. Sample diagnostics to globally assess data similarities and identify outliers.** RNA-seq was carried out using the Illumina platform on *L. major* procyclic and metacyclic promastigotes. Letters (A-F) in the sample name refer to experimental batch. Numbers are unique identifiers as shown in Table S1. Samples identified as outliers are indicated with an asterisk. A.) *Distribution of normalized gene counts by sample.* For each sample, counts were normalized for sequencing library size and a box plot was generated to compare the distribution of per-gene counts (log<sub>2</sub> counts per million with an offset of 1). The ends of the whiskers represent the lowest datum still within 1.5 interquartile range (IQR) of the lower quartile, and the highest datum still within 1.5 IQR of the upper quartile. Gene features with extremely high or low expression levels are shown as open circles above and below the whiskers, respectively. B.) *Heatmap of Pearson correlation between samples.* Raw count data were used to generate a heatmap to illustrate the Pearson correlation between samples. The color key and histogram for the frequency of correlation values (range of 0.85-1) is shown below the heatmap. C.) *Median pairwise correlation.* Raw count data were used to compute the median pairwise correlation between each sample and all other samples. The median pairwise correlation across all samples was used to establish a cutoff value to identify outlier samples (dotted line). Samples are colored according to stage (blue=procyclic, orange=metacyclic).

**Figure S2. Mean-variance curve modeling and fitting of a local regression trend line by `voom`.** After log-transforming the quantile-normalized data, the `voom` function in `limma` was used to compute the mean-variance relationship for the transformed data and to generate gene weights that are used for the subsequent differential expression analysis. The relationship between mean expression (log<sub>2</sub> counts per million with an offset of 0.5) and variance were modeled by `voom` and a trend line was created using a local regression (`loess`). Trend line values (red line) are robust to genes with high variability and are used as gene weights by `limma`.

**Figure S3. Sample characterization.** **A.** Phase contrast images of log-phase procyclic promastigotes, stationary phase promastigotes prior to enrichment for metacyclics, promastigotes following negative selection by PNA, and Ficoll-purified promastigotes. The bar in each panel represents 5  $\mu$ m. **B.** Relative percentages of procyclic and metacyclic promastigotes in culture prior to and after the application of enrichment methods, as determined by counting 15 fields. **C.** Infections were established in peritoneal macrophages isolated from C57BL/6 mice using Ficoll-purified metacyclic promastigotes at an MOI of 5:1 in the presence of C5-deficient serum from DBA mice. Plots show the number of parasites observed per macrophage and the percentage of infected macrophages observed over the first 48 hours of the infection from one representative experiment. Asterisks indicate a significant difference in the number of parasites per 100 cells at 48 hours.

**Figure S4. Principal Component Analysis (PCA) and hierarchical clustering analysis before accounting for batch effects.** RNA-seq was carried out on *L. major* procyclic (log phase) promastigotes and metacyclic promastigotes isolated after enrichment using Ficoll or PNA. A principal component analysis (PCA) plot (A) and heatmap of a hierarchical clustering analysis using the Euclidean distance metric (B) are shown. Both analyses were performed on all *L. major* annotated genes (8,475) after filtering for low counts and quantile normalization. In the PCA plot, each point represents an experimental sample with point color indicating *L. major* developmental stage (blue = procyclic promastigote, orange = metacyclic promastigote) and point shape indicating batch/experimental date. Colors along the top of the heatmap indicate the developmental stage (blue = procyclic promastigote, orange = metacyclic promastigote) and colors along the left side of the heatmap indicate the batch/experimental date.

**Figure S5. Gene ontology trees.** Enriched GO terms were visualized as an ancestor chart using QuickGO (1) for genes (A) downregulated and (B) upregulated in metacyclic promastigotes relative to procyclic promastigotes. Colored boxes show GO terms included in the input dataset.

**Figure S6. UTR length distribution by developmental stage.** *Trans*-splicing sites were identified for each developmental stage and used to determine the coordinates and lengths of 5' UTRs for procyclic promastigotes (A) and metacyclic promastigotes (B). An analysis of polyadenylation sites in each developmental stage was performed to determine 3' UTR coordinates and lengths for procyclic promastigotes (C) and metacyclic promastigotes (D).

**Figure S7. Visualization of changes in primary *trans*-splicing sites across developmental stages.** The Integrative Genomics Viewer (IGV) (2) was used to visualize the number of reads that mapped to each *trans*-splicing site for three genes which showed a change in the preferred primary site between developmental stages and had a significant number of reads mapped to each primary site - LmjF.31.0710 (A), LmjF.33.0310 (B), and LmjF.36.3810 (C). The number of reads that mapped to each primary site (bold) and secondary site are shown for both procyclic promastigotes (blue text) and metacyclic promastigotes (orange text).

**Table S1. Experimental design.** Samples are listed using an internal lab sample identifier (HPGL----), which is referenced in the record stored at the Short Read Archive (accession numbers provided), and an additional simple identifier (1-15) for clarity in the text and figures. Experimental batches (A-F) are defined based on the start date of the experiment with each batch originating from a separate growth of cells. The number of reads sequenced, number and percentage of reads mapping to the *L. major* genome (v. 6.0), number and percentage of reads containing evidence of the SL sequence, and number and percentage of reads containing evidence of polyadenylation are also included.

**Table S2. Dinucleotide acceptor site usage frequency.** The percentage of primary and minor *trans*-splicing sites that use each dinucleotide acceptor sequence.

**Dataset S1. Coordinates of novel ORFs.** Novel open reading frames of at least 90 nucleotides in length were identified by manual annotation of translational evidence from a ribosome profiling study of *L. major* procyclic promastigote samples.

**Dataset S2. Results from differential expression analysis of *L. major* metacyclogenesis using *limma* (protein-coding genes from TriTrypDB v 6.0).** **A.** Significant genes ( $P$  values < 0.05). **B.** All genes (no  $P$  value cutoff applied).

**Dataset S3. Results from differential expression analysis of *L. major* metacyclogenesis using *limma* (protein-coding genes from TriTrypDB v 6.0 and 1,044 novel ORFs).** **A.** Significant genes ( $P$  values < 0.05). **B.** All genes (no  $P$  value cutoff applied).

**Dataset S4. Enriched GO categories and corresponding differentially expressed genes.** GOseq was used to identify gene ontology (GO) categories enriched for genes downregulated or upregulated in metacyclic promastigotes relative to procyclic promastigotes. For each enriched GO category, the  $P$  value for the enrichment is reported, as are the number and identity of DE genes in the dataset and the total number of *L. major* genes in the GO category.

**Dataset S5. UTR coordinates.** The *trans*-splicing sites and start coordinate of each associated CDS/ORF were used to determine 5' UTR coordinates. The CDS/ORF end coordinate and associated polyadenylation sites were used to determine 3' UTR coordinates. For each UTR coordinate, the number of reads that mapped to that site in each developmental stage are reported.

#### SUPPLEMENTARY REFERENCES

1. Binns, D., Dimmer, E., Huntley, R., Barrell, D., O'Donovan, C. and Apweiler, R. (2009) QuickGO: a web-based tool for Gene Ontology searching. *Bioinformatics*, **25**, 3045-3046.
2. Robinson, J.T., Thorvaldsdóttir, H., Winckler, W., Guttman, M., Lander, E.S., Getz, G. and Mesirov, J.P. (2011) Integrative genomics viewer. *Nat Biotechnol*, **29**, 24-26.
